# Supplementary material
Source: publisher site journal article supplement (https://www.degruyterbrill.com/publication/isbn/9783899496093/downloadAsset/9783899496093_Inhaltsverzeichnis.pdf)
Supplement: Supplementary file 1 [file 9783899496093_Inhaltsverzeichnis.pdf]

## Inhaltsverzeichnis

| Nr. |                                                                                                                                                         | Seite |
|-----|---------------------------------------------------------------------------------------------------------------------------------------------------------|-------|
| 1   | Religionsunterricht in Brandenburg. BVerfG, Nichtannahmebeschluss vom 8.1.2004 (1 BvR 1406/02).....                                                     | 1     |
| 2   | Befreiung vom Sexualkundeunterricht. VG Hamburg, Beschluss vom 12.1.2004 (15 VG 5827/2003).....                                                         | 4     |
| 3   | Eingruppierung eines Friedhofsverwalters. LAG Schleswig-Holstein, Urteil vom 14.1.2004 (3 Sa 512/02) .....                                              | 13    |
| 4   | Kirchgeld in glaubensverschiedener Ehe nach bremischem Kirchensteuerrecht. FG Bremen, Urteil vom 14.1.2004 (2 K 223/03 (1)) .....                       | 20    |
| 5   | Kürzung von Sonderzuwendungen für Kirchenbeamte. VG Darmstadt, Urteil vom 15.1.2004 (1 E 540/99) .....                                                  | 38    |
| 6   | Befreiung von der Baugenehmigungsgebühr für kirchl. Kindergarten. OVG Nordrhein-Westfalen, Beschluss vom 16.1.2004 (9 A 4608/02) ..                     | 49    |
| 7   | Sorgerechtsregelung bei Zugehörigkeit eines Elternteils zu Zeugen Jehovas. AG Ribnitz-Damgarten, Nichtabhilfebeschluss vom 19.1.2004 (4 F 294/03) ..... | 53    |
| 8   | Asylrecht für zum Christentum konvertierte Muslime aus dem Iran, sog. religiöses Existenzminimum. BVerwG, Urteil vom 20.1.2004 (1 C 9/03) .....         | 54    |
| 9   | Ausnahmegenehmigung nach § 4a Abs. 2 Nr. 2 TierSchG. VG Augsburg, Beschluss v. 21.1.2004 (Au 5 E 03.2198).....                                          | 63    |
| 10  | Gesetzliche Zuweisung in Kircheneigentum kraft Widmung. BGH, Urteil vom 23.1.2004 (V ZR 205/03).....                                                    | 66    |
| 11  | Justizgewährungsanspruch bei der Überprüfung kirchlicher Maßnahmen. BVerfG, Beschluss vom 27.1.2004 (2 BvR 496/01) .....                                | 69    |
| 12  | Mitgliedschaft in israelitischer Kultusgemeinde. BFH, Urteil vom 28.1.2004 (I R 63/02).....                                                             | 76    |
| 13  | Urheberschutz für Revisionsfassung der Lutherbibel. LG Stuttgart, Urteil vom 29.1.2004 (17 O 679/03) .....                                              | 79    |
| 14  | Arbeitsgenehmigung für Ordensschwester. LSG Rheinland-Pfalz, Urteil vom 29.1.2004 (L 1 AL 113/01) .....                                                 | 90    |
| 15  | Feiertagsschutz. Schlachtungen für muslim. Opferfest. Hess.VGH, Beschluss vom 30.1.2004 (11 TG 326/04) .....                                            | 96    |

|    |                                                                                                                                                                                                               |     |
|----|---------------------------------------------------------------------------------------------------------------------------------------------------------------------------------------------------------------|-----|
| 16 | Ladenschluss. Ausnahmegenehmigung für muslim. Opferfest. Hess.VGH, Beschluss vom 30.1.2004 (8 TG 327/04) . . . . .                                                                                            | 104 |
| 17 | Ausnahmegenehmigung nach § 4a Abs. 2 Nr. 2 TierSchG. Schl.-Holst. Verwaltungsgericht, Beschluss vom 30.01.2004 (1 B 7/04) . . . . .                                                                           | 106 |
| 18 | Hilfeleistungen zum Kirchen- oder Friedhofsbesuch kein berücksichtigungsfähiger Pflegeaufwand. LSG Nordrhein-Westfalen, Urteil vom 9.2.2004 (L 3 P 22/03) . . . . .                                           | 114 |
| 19 | Praktische Konkordanz zwischen Versammlungsfreiheit u. Glaubens- und Bekenntnisfreiheit. VG Dresden, Beschluss vom 11.2.2004 (14 K 273/04) . . . . .                                                          | 115 |
| 20 | Staatl. Warnung vor Sekten. OVG Nordrhein-Westfalen, Beschluss vom 16.2.2004 (5 A 637/02) . . . . .                                                                                                           | 127 |
| 21 | „Kirchenasyl Berlin“ als unzureichende Anschrift eines Asylbewerbers. VG Frankfurt (Oder), Beschluss vom 16.2.2004 (6 L 567/03.A) . . . . .                                                                   | 141 |
| 22 | Unfallversicherungsschutz im Ausland für einen von einer inländischen Pfarrgemeinde entsandten Missionar auf Zeit. LSG Rheinland-Pfalz, Urteil vom 17.2.2004 (L 3 U 111/03) . . . . .                         | 142 |
| 23 | Verurteilung zur Unterlassung einer verdeckten Tatsachenbehauptung. BVerfG, Beschluss vom 19.2.2004 (1 BvR 417/98) . . . . .                                                                                  | 151 |
| 24 | Steuerliche Berücksichtigung des häuslichen Arbeitszimmers eines Pfarrers. BFH, Beschluss vom 25.2.2004 (VI B 167/02) . . . . .                                                                               | 156 |
| 25 | Nacheheliche Unterhaltspflicht eines wiederverheirateten ev. Pfarrers. BVerfG, Beschluss vom 25.2.2004 (1 BvR 1000/98) . . . . .                                                                              | 158 |
| 26 | Sorgerechtsregelung bei Zugehörigkeit eines Elternteils zu Zeugen Jehovas. OLG Köln, Beschluss vom 25.2.2004 (21 UF 257/03) . . . . .                                                                         | 161 |
| 27 | Stundensatz eines Berufsbetreuers mit abgeschlossenem Theologiestudium. OLG Köln, Beschluss vom 25.2.2004 (16 Wx 27/04) . . . . .                                                                             | 162 |
| 28 | Personalratswahl beim Evangelischen Kirchenamt für die Bundeswehr. OVG Nordrhein-Westfalen, Beschluss vom 4.3.2004 (1B 445/04.PVB) . . . . .                                                                  | 163 |
| 29 | Grunderwerbsteuer-Befreiung nach § 4 Nr. 1 GrEStG bei Übergang eines Kindergartens samt Grundstück von einer Kirchenstiftung auf eine Zivilgemeinde. FG München, Urteil vom 10.3.2004 (4 K 2439/03) . . . . . | 166 |
| 30 | Kirchgeld in glaubensverschiedener Ehe nach baden-württembergischem Kirchensteuerrecht. FG Baden-Württemberg, Urteil vom 12.3.2004 (9 K 43/01) . . . . .                                                      | 168 |

|    |                                                                                                                                                     |     |
|----|-----------------------------------------------------------------------------------------------------------------------------------------------------|-----|
| 31 | Sondernutzungserlaubnis für Straßenmission. Niedersächsisches OVG, Beschluss vom 15.3.2004 (12 LA 410/03) . . . . .                                 | 174 |
| 32 | Kirchl. Arbeitszeitregelung in Hausvertrag. BAG, Urteil vom 16.3.2004 (9 AZR 93/03). . . . .                                                        | 179 |
| 33 | Beachtung der Religionszugehörigkeit bei Adoption. AG Kerpen, Beschluss vom 17.3.2004 (60 XVI 8/02). . . . .                                        | 187 |
| 34 | Befreiung von der Schulbesuchspflicht aus religiösen Gründen. BVerfG, Nichtannahmebeschluss vom 19.3.2004 (1 BvR 2363/03) . . . .                   | 192 |
| 35 | Unterlassungsbegehren betr. Betätigung von Jugendgruppe auf Pfarrgrundstück, Rechtsweg. BayVGh, Beschluss vom 19.3.2004 (22 C 04.679) . . . . .     | 193 |
| 36 | Unbefugtes Tragen kirchlicher Amtskleidung. LG Offenburg, Urteil vom 24.3.2004 (6 Ns 11 Js 13560/02). . . . .                                       | 195 |
| 37 | Aufhebung eines Bescheids über Friedhofsgebühren. VG Regensburg, Urteil vom 24.3.2004 (RO 3 K 03.00908). . . . .                                    | 198 |
| 38 | Erweiterung eines kirchl. Friedhofs. OVG Nordrhein-Westfalen, Beschluss vom 26.3.2004 (19 A 546/02). . . . .                                        | 202 |
| 39 | Kunstwerk in einer Kirche, urheberrechtl. Schutz des Aufstellungs-ortes. OLG Naumburg, Urteil vom 31.3.2004 (6 U 36/03) . . . . .                   | 209 |
| 40 | Abbrennen eines Osterfeuers. OVG Nordrhein-Westfalen, Beschluss vom 7.4.2004 (21 B 727/04) . . . . .                                                | 211 |
| 41 | Bestimmung der Schulart bei Schulzusammenlegung. VG Düsseldorf, Beschluss vom 12.4.2004 (18 L 1378/04). . . . .                                     | 215 |
| 42 | Zeugin Jehovas, Beteiligung an gemeinsamer elterlicher Gesundheitsfürsorge. AG Peine, Beschluss vom 13.4.2004 (20 F 2373/03 SO) . . . .             | 218 |
| 43 | Grabstellengebühr auf jüd. Friedhof, Erstattung aus Sozialhilfemitteln. VG Hannover, Urteil vom 23.4.2004 (7 A 4014/03). . . . .                    | 219 |
| 44 | Thomanerchor Leipzig. VG Leipzig, Urteil vom 3.5.2004 (6 K 1168/03) . . .                                                                           | 223 |
| 45 | Veröffentlichung personenbezogener Daten auf der Internetseite einer ev. Landeskirche. VG München, Beschluss vom 3.5.2004 (M 17 E 04.1908). . . . . | 231 |
| 46 | Zulassung zum Studium an kirchl. Fachhochschule. Berlin, Beschluss vom 4.5.2004 (12 A 117.04) . . . . .                                             | 236 |
| 47 | Erstattung von Kirchensteuer. BFH, Beschluss vom 5.5.2004 (XI B 27/04) . . . . .                                                                    | 239 |

|    |                                                                                                                                                |     |
|----|------------------------------------------------------------------------------------------------------------------------------------------------|-----|
| 48 | Gestaltungsvorschriften für Grabmale. BVerwG, Urteil vom 13.5.2004 (3 C 26/03) . . . . .                                                       | 243 |
| 49 | Urheberrechtlicher Schutz bei Veränderungen an einem Kirchengebäude. LG Mannheim, Urteil vom 14.5.2004 (7 O 373/03) . . . . .                  | 249 |
| 50 | Teilzeitbeschäftigung einer Sozialarbeiterin im kirchlichen Krankenhaus. BAG, Urteil vom 18.5.2004 (9 AZR 319/03) . . . . .                    | 254 |
| 51 | Verkehrssicherungspflicht bei Fronleichnamsprozession. AG Überlingen, Urteil vom 26.5.2004 (6 C 129/04) . . . . .                              | 266 |
| 52 | Konfessionsgebundenes Staatsamt. Niedersächsisches OVG, Urteil vom 8.6.2004 (5 LB 344/03) . . . . .                                            | 268 |
| 53 | Verbot der Ladenöffnung an Sonn- und Feiertagen. BVerfG, Urteil vom 9.6.2004 (1 BvR 636/02) . . . . .                                          | 282 |
| 54 | Eheverbot für muslimische Frau / Nichtmuslim in Bangladesh. KG, Beschluss vom 16.6.2004 (1 W 392/03) . . . . .                                 | 312 |
| 55 | Rechtsweg bei Entzug der Beglaubigung als Prediger. BAG, Beschluss vom 17.6.2004 (5 AS 3/04) . . . . .                                         | 318 |
| 56 | Steuerliche Berücksichtigung eines häuslichen Arbeitszimmers bei mehreren Tätigkeiten. BFH, Urteil vom 17.6.2004 (IV R 33/02) . . . . .        | 321 |
| 57 | Verhaltensempfehlung staatl. Stellen für den Geschäftsverkehr mit Scientology. Hamburgisches OVG, Urteil vom 17.6.2004 (1 Bf 198/00) . . . . . | 326 |
| 58 | Sorgerechtsregelung bei Zugehörigkeit eines Elternteils zu den Zeugen Jehovas. AG Osnabrück, Beschluss vom 23.6.2004 (69 F 173/04) . . . . .   | 347 |
| 59 | Demonstration gegen Synagogenbau. BVerfG, Beschluss vom 23.6.2004 (1 BvQ 19/04) . . . . .                                                      | 348 |
| 60 | Griechischer Taufname im deutschen Geburtenbuch. OLG Köln, Beschluss vom 23.6.2004 (16 Wx 124/04) . . . . .                                    | 357 |
| 61 | Kopftuchverbot für muslimische Lehrerin im öffentlichen Schuldienst. BVerwG, Urteil vom 24.6.2004 (2 C 45/03) . . . . .                        | 361 |
| 62 | Parzelle für Bethaus im Flächennutzungsplan. EGMR, Urteil v. 24.6.2004 (No. 65501/01 [Vergos ./, Griechenland]) . . . . .                      | 371 |
| 63 | Berücksichtigung pauschalierter Kirchensteuer beim Arbeitslosengeld. LSG Berlin, Urteil vom 25.6.2004 (L 4 AL 45/03) . . . . .                 | 381 |
| 64 | Versicherungspflichtiges Beschäftigungsverhältnis eines Organisten. LSG Baden-Württemberg, Urteil vom 30.6.2004 (L 11 KR 4041/03) . .          | 388 |
